# Supplementary material for: Fabrication of core@spacer@shell Aunanorod@mSiO2@Y2O3:Er nanocomposites with enhanced upconversion fluorescence
Source: Royal Society of Chemistry journal article supplement (doi:10.1039/c5ra23884f), 2016-01-01
Supplement: c5ra23884f1.pdf [file c5ra23884f1.pdf]

### Supplementary Information

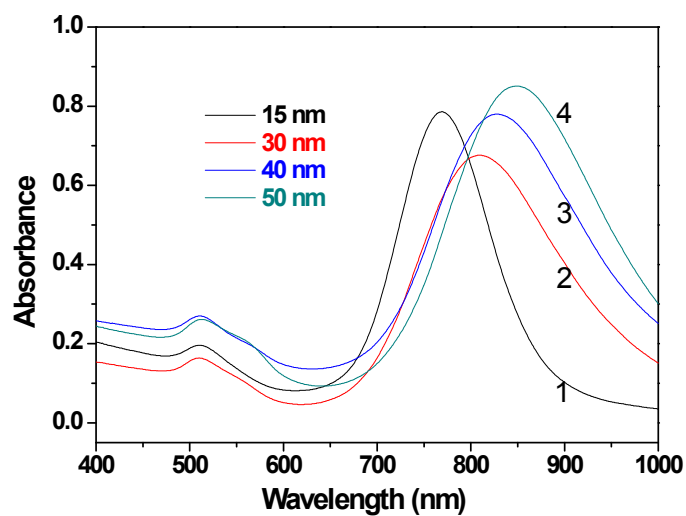

**Fig. S1** The red shift of the longitudinal absorption peaks of Au<sub>nanorod</sub>@mSiO<sub>2</sub> with different silica thickness.

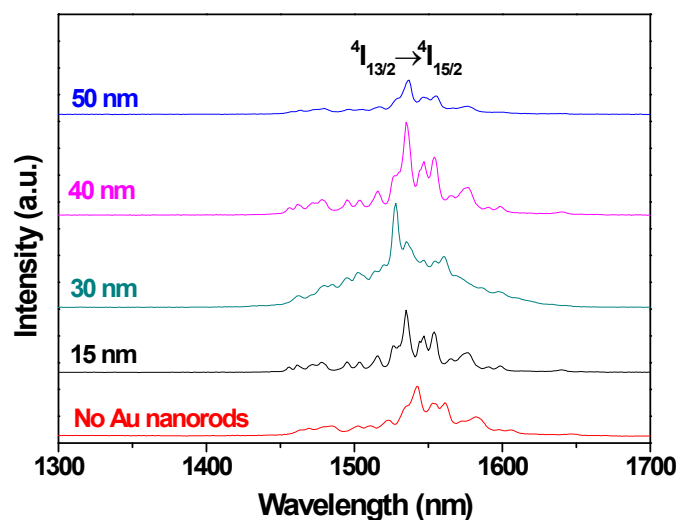

**Fig. S2** Down conversion spectra of Y<sub>2</sub>O<sub>3</sub>:Er and Au<sub>nanorod</sub>@mSiO<sub>2</sub>@Y<sub>2</sub>O<sub>3</sub>:Er nanocomposites with different spacer thickness of silica.

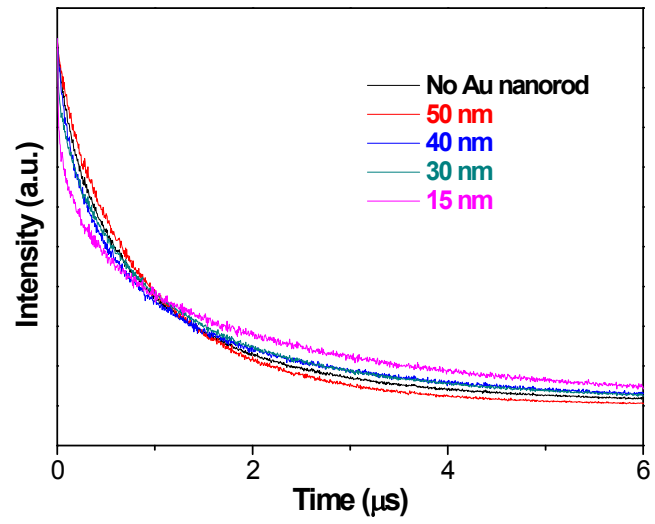

**Fig. S3** Decay curves of  $\text{Y}_2\text{O}_3:\text{Er}$  and  $\text{Au}_{\text{nanorod}}@\text{mSiO}_2@\text{Y}_2\text{O}_3:\text{Er}$  nanocomposites with different spacer thickness of silica
